# Supplementary material
Source: Royal Society of Chemistry journal article supplement (doi:10.1039/d6gc01239f)
Supplement: d6gc01239f1.pdf [file d6gc01239f1.pdf]

## Supporting Information

### Two-Second Surface-confined Reconstruction of Cellulose Paper via a Recyclable Molten Salt Hydrate for Water-resistant Bioplastics

Ping Wang <sup>a, b, †</sup>, Zhonglei Huang <sup>b, †</sup>, Meiyang Wu <sup>b</sup>, Safoora Mirmohamadsaghi <sup>c</sup>, Chao Liu <sup>b</sup>, Guang Yu <sup>b</sup>, Haishun Du <sup>d, \*</sup>, Jing Shen <sup>a, c, \*</sup>, Bin Li <sup>b, \*</sup>

<sup>a</sup> Research Division for Sustainable Papermaking & Advanced Materials, Key Laboratory of Biobased Materials Science and Technology of Ministry of Education, Northeast Forestry University, Harbin 150040, China

<sup>b</sup> Qingdao New Energy Shandong Laboratory, System Integration Engineering Center, Qingdao Institute of Bioenergy and Bioprocess Technology, Chinese Academy of Sciences, Qingdao 266101, China

<sup>c</sup> Department of Biotechnology, Faculty of Biological Science and Technology, University of Isfahan, Isfahan 81746-73441, Iran

<sup>d</sup> Department of Forestry, Michigan State University, East Lansing, 48824, USA

<sup>e</sup> Limerick Pulp and Paper Centre, Department of Chemical Engineering, University of New Brunswick, Fredericton, NB E3B 6C2, Canada

Corresponding authors' E-mail addresses: [hdu@msu.edu](mailto:hdu@msu.edu) (H. Du), [jingshen@nefu.edu.cn](mailto:jingshen@nefu.edu.cn), [Jing.Shen@unb.ca](mailto:Jing.Shen@unb.ca) (J. Shen), [libin@qibebt.ac.cn](mailto:libin@qibebt.ac.cn) (B. Li)

<sup>†</sup> The first two authors contributed equally.

## Experimental characterizations

The Fourier Transform Infrared-Attenuated Total Reflection (FTIR-ATR) spectra of FP and MFP<sub>120-2</sub> samples were recorded using a spectrometer (Thermo Fisher, Nicolet 6700, USA) in the range of 4000–1500 cm<sup>-1</sup>. Each sample was subjected to 64 scans, and the hydrogen density of the samples were calculated based on the previous literature.<sup>1-3</sup> Furthermore, the morphologies of FP and MFP samples were observed using a scanning electron microscope (SEM, Hitachi S-4800, Japan) with the acceleration voltage of 3 kV. In addition, X-ray photoelectron spectroscopy (XPS) spectra of FP and MFP<sub>120-2</sub> samples were collected using a spectrometer (Shimadzu, AXIS SUPRA+, Japan) at an analyzer pass energy of 100 eV. The morphology of MFP<sub>120-2</sub> sample was examined by a high-resolution transmission electron microscope (TEM, H-7600, Hitachi, Tokyo, Japan) at an accelerating voltage of 80 kV. The X-ray Diffraction (XRD) patterns of FP and MFP samples were collected on a diffractometer (Bruker, D8-Advance, Germany) with Ni-filtered Cu K $\alpha$  radiation ( $\lambda = 1.5406 \text{ \AA}$ ) at 40 kV and 40 mA. The range of scattering angle ( $2\theta$ ) was from 5 to 60° with a scanning step size of 0.02° and a scanning rate of 4 °·min<sup>-1</sup>. The crystallinity index of the sample was estimated according to Segal's method using the Equation (1).<sup>4</sup>

$$CrI = \frac{I_{200} - I_{am}}{I_{200}} \times 100 \quad (1)$$

Where,  $I_{200}$  represents the maximum intensity of lattice diffraction from the main (200) peak,  $I_{am}$  values for cellulose are the minimum diffraction intensities observed between the plane reflections (110)/(200) and (1-10)/(110), respectively. For amorphous cellulose, the  $I_{am}$  values are selected as the peak intensities corresponding to the maximum value of the first-order derivative.<sup>5</sup>

Tensile properties of FP and MFP samples (50 mm  $\times$  10 mm) were measured at 25 °C and 50% relative humidity (RH) using a universal testing machine (MTS Systems, CMT 6503, China) equipped with a 1000 N load cell at a crosshead speed of

5 mm·min<sup>-1</sup>, following the TAPPI T497 standard. Wet tensile strength measurements were conducted in accordance with TAPPI T456. Each sample was tested 5 times, and the reported values represent the mean ± standard deviation.

The water contact angle of FP and MFP samples were conducted using a contact angle goniometer (KINO, SL200B, USA) at 25 °C under 50% RH. The solvent resistance of MFP<sub>120-2</sub> was further evaluated by immersion in various organic solvents, including ethanol, isopropanol, acetone, tetrahydrofuran, and dimethylformamide and the morphology before and after a week of immersion was recorded at 25 °C. FP and MFP<sub>120-2</sub> samples were immersed in deionized water (DI water). The samples were taken out daily, surface moisture was wiped off, and the weight was measured immediately. The water absorption rates of the films were calculated using the Equation (2).

$$\text{Water absorption rate} = \frac{M_1 - M_0}{M_0} \times 100\%$$

(2)

Where,  $M_1$  and  $M_0$  are the mass of films after and before immersion in water, respectively.

The thermogravimetric analysis (TGA) of FP and MFP<sub>120-2</sub> samples were detected by a TG-DSC analyzer (NETZSCH, STA 449F5 Jupiter, USA) from 50 to 600 °C with a heating rate of 10 °C·min<sup>-1</sup> in a nitrogen atmosphere (25 mL·min<sup>-1</sup>).

The oxygen transmission rate (OTR) of MFP<sub>120-2</sub> sample was tested using an OTR tester (Jinan Labthink, VAC-V2, China) at 25 °C under 0% RH based on the ISO 2556:2001 standard. A round film with a diameter of 50 mm<sup>2</sup> was placed on a tester and sealed under vacuum for 8 h. Coefficient of thermal expansion (CTE) of FP and MFP<sub>120-2</sub>, poly(lacticacid) (PLA), polyethylene (PE), polyurethane (PU) and polypropylene (PP) samples were detected by a thermomechanical analyzer (TMA450(EM)) from -20 °C to 160 °C with a heating rate of 10 °C·min<sup>-1</sup>.<sup>6</sup>

In addition, the biodegradability of the films was tested using two methods, i.e. landfill and compost biodegradation, respectively. The landfill biodegradation tests of

the films were conducted in the City of Qingdao (China) from October to November (Winter test).<sup>7</sup> Briefly, the films were cut into round pieces with length of 40 mm and width of 40 mm, and then were buried in natural soil at a depth of 10 cm. These samples were taken regularly for observation, and the mass loss of samples was also calculated. The compost biodegradation tests were carried out based on the previous report.<sup>8</sup> Briefly, the waste matrix was obtained by mixing 40% wood chip, 30% rabbit feed, 10% ripe compost, 10% corn starch, 5% saccharose, 4% corn oil, and 1% urea, and then deionized water (DI) was added with the matrix/water ratio of 45/55. The circular film samples with a diameter of 4 cm were buried at a depth of 6 cm. The biodegradation environment was maintained at  $58 \pm 2$  °C, and DI water was supplemented regularly to maintain the moisture content of the compost. Prior to weighing the film, the waste matrix was meticulously removed from the surface. The mass loss of the films was calculated using the Equation (3).

$$Mass\ loss\ (\%) = \frac{m_i - m_d}{m_i} \times 100\% \quad (3)$$

Where,  $m_i$  is the mass of the initial film,  $m_d$  is the mass of the film after compost degradation.

The apparent density of the samples was determined according to the general principle of ISO 534:2011. The thickness of 9 cm diameter FP and MFP<sub>120-2</sub> sample was measured as single-sheet thickness using a Yuan Heng Tong digital micrometer (YHT127), and the average value from 10 random positions was used for calculation. The dry mass of each sample was measured using an analytical balance, and the apparent density was calculated from the mass and geometric volume. Each sample was tested 10 times, and the reported values represent the mean  $\pm$  standard deviation.

The life cycle assessment (LCA) of the films was conducted and compared using Simapro 9.5 software through a comparative cradle-to-gate.<sup>9</sup> In this study, the functional unit was defined as the production of 1 kg MFP<sub>120-2</sub> Straw. Eleven environmental impact categories were assessed by the ReCiPe 2016 Midpoint method.

**Table S1.** Sample abbreviations of paper-based materials prepared under different processing conditions.

| <b>Sample</b>          | <b>Temperature<br/>(°C)</b> | <b>Immersion Time<br/>(s)</b> |
|------------------------|-----------------------------|-------------------------------|
| FP                     | -                           | -                             |
| MFP <sub>100</sub> -2  | 100                         | 2                             |
| MFP <sub>100</sub> -6  | 100                         | 6                             |
| MFP <sub>100</sub> -10 | 100                         | 10                            |
| MFP <sub>100</sub> -20 | 100                         | 20                            |
| MFP <sub>110</sub> -2  | 110                         | 2                             |
| MFP <sub>110</sub> -6  | 110                         | 6                             |
| MFP <sub>110</sub> -10 | 110                         | 10                            |
| MFP <sub>110</sub> -20 | 110                         | 20                            |
| MFP <sub>120</sub> -2  | 120                         | 2                             |
| MFP <sub>120</sub> -6  | 120                         | 6                             |
| MFP <sub>120</sub> -10 | 120                         | 10                            |
| MFP <sub>120</sub> -20 | 120                         | 20                            |
| MFP <sub>130</sub> -2  | 130                         | 2                             |
| MFP <sub>140</sub> -2  | 140                         | 2                             |

FP: pristine filter paper as the control.

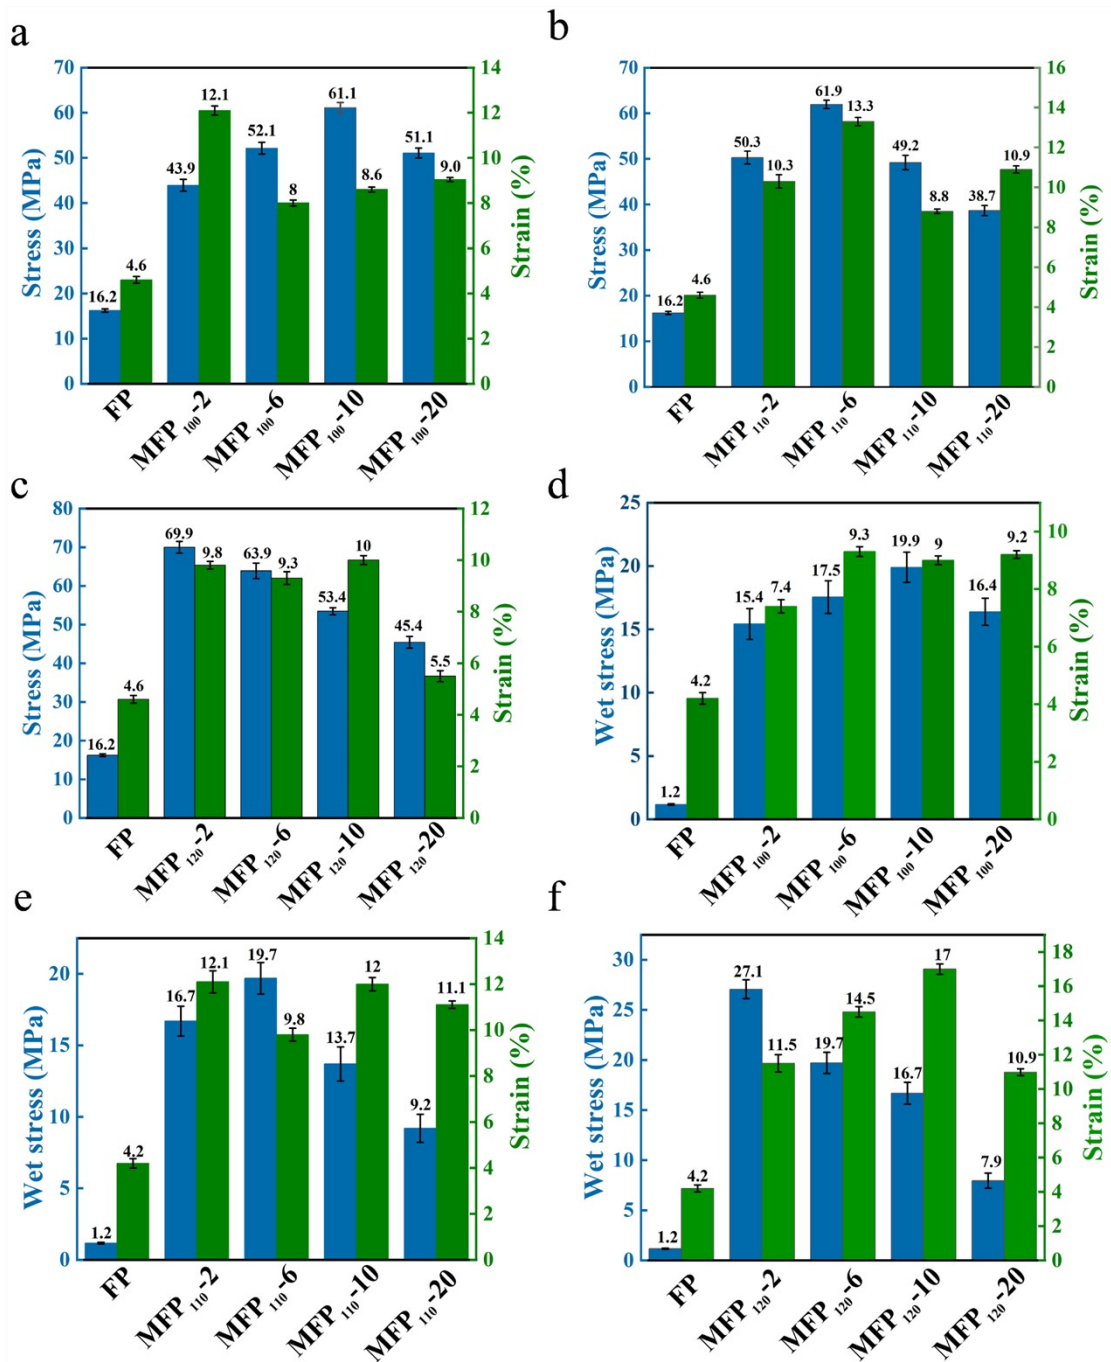

**Figure S1.** (a–c) Statistical analysis of tensile properties under dry conditions for cellulose-based bioplastics obtained after LBTH treatment at 100 °C (a), 110 °C (b), and 120 °C (c) for different immersion durations. (d–f) Corresponding wet tensile properties measured after water immersion for 24 h.

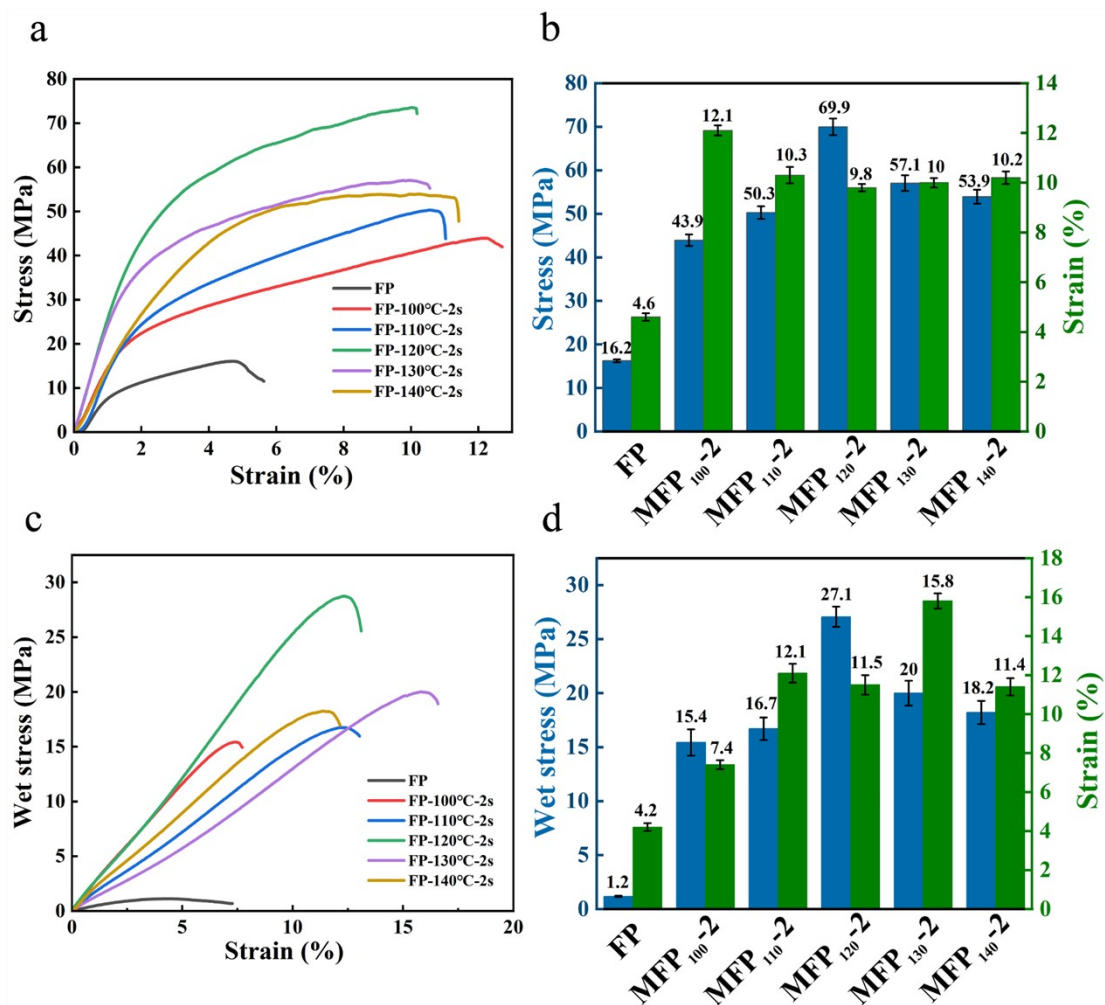

**Figure S2.** (a, b) Tensile stress–strain curves (a) and corresponding statistical analysis (b) under dry conditions for cellulose-based bioplastics obtained after LBTH treatment for 2 s at different temperatures. (c, d) Tensile stress–strain curves (c) and corresponding statistical analysis (d) measured after water immersion for 24 h.

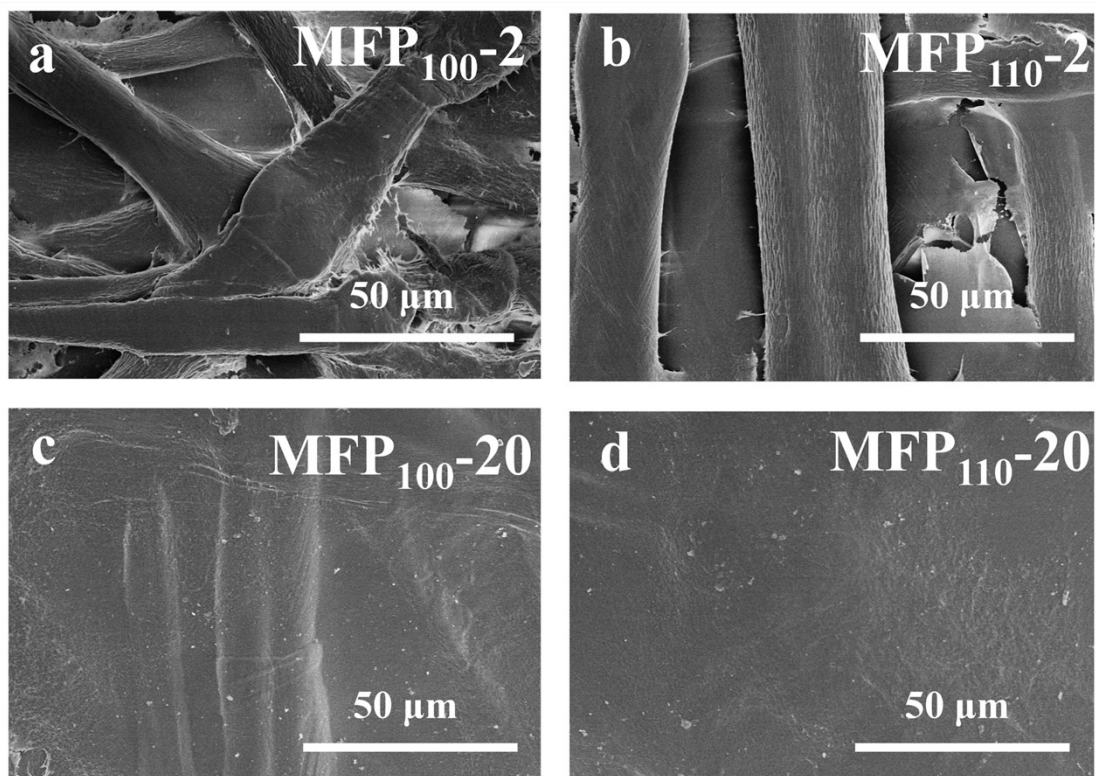

**Figure S3.** SEM images of MFP<sub>100</sub>-2 (a), MFP<sub>110</sub>-2 (b), MFP<sub>100</sub>-20 (c), and MFP<sub>110</sub>-20 (d).

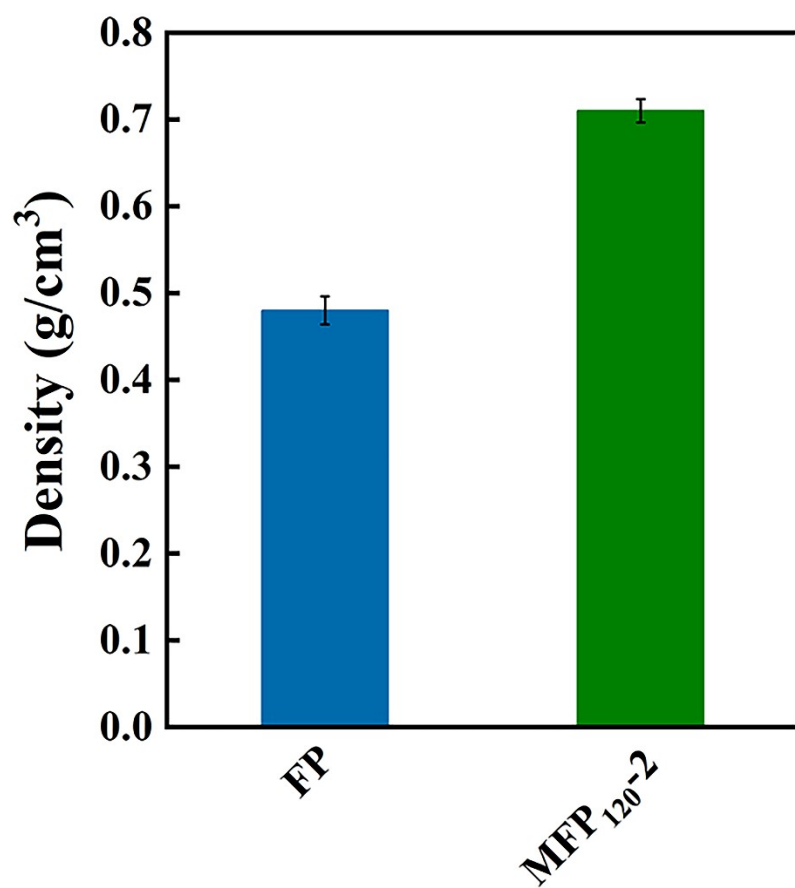

Figure S4. Density of FP and MFP<sub>120-2</sub>.

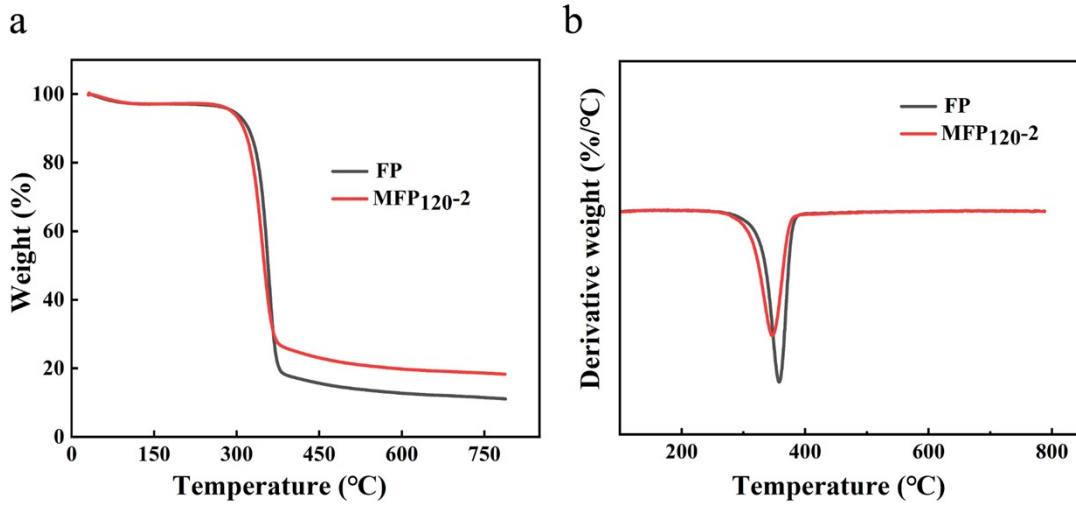

**Figure S5.** Thermogravimetric analysis (TGA) (a) and derivative thermogravimetric (DTG) (b) curves of FP and MFP<sub>120-2</sub>.

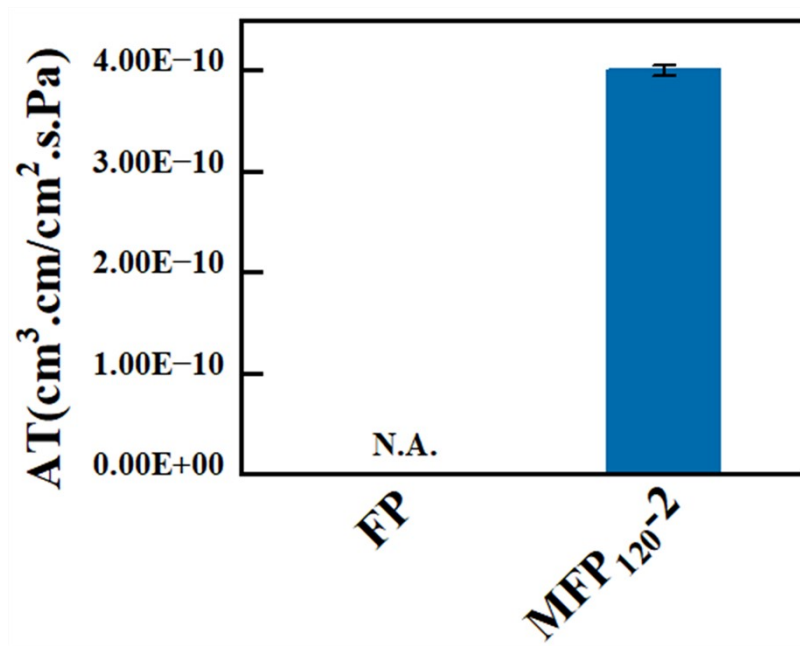

Figure S6. Oxygen transmission rate (OTR) of FP and MFP<sub>120-2</sub>. *N.A.* indicates not applicable.

a

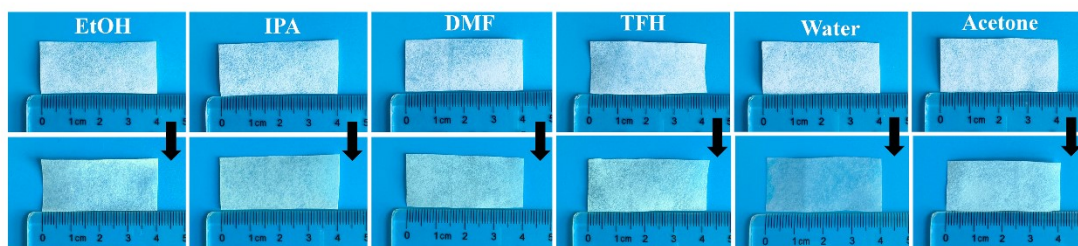

b

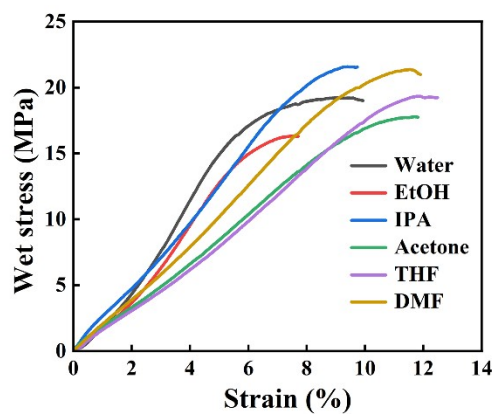

c

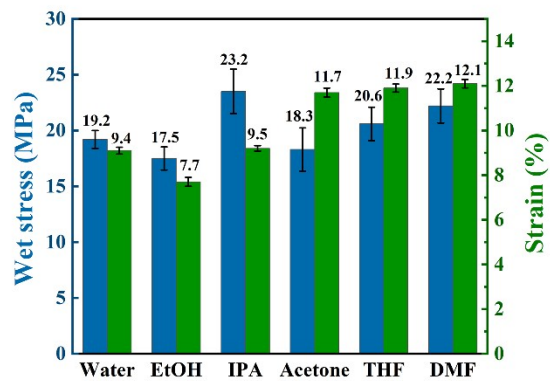

**Figure S7.** (a) Photographs of MFP<sub>120-2</sub> after immersion in different organic solvents for 7 days. (b, c) Tensile stress-strain curves (b) and corresponding statistical analysis (c) of MFP<sub>120-2</sub> after immersion in organic solvents for 7 days.

a

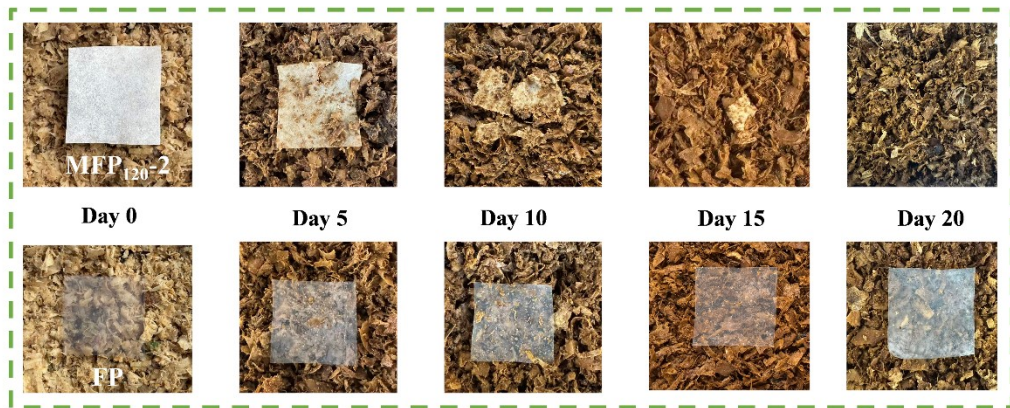

b

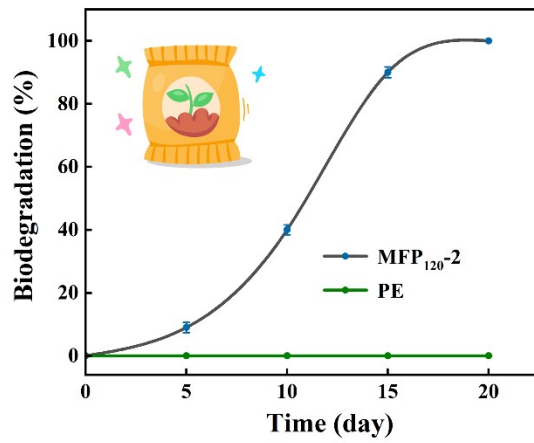

c

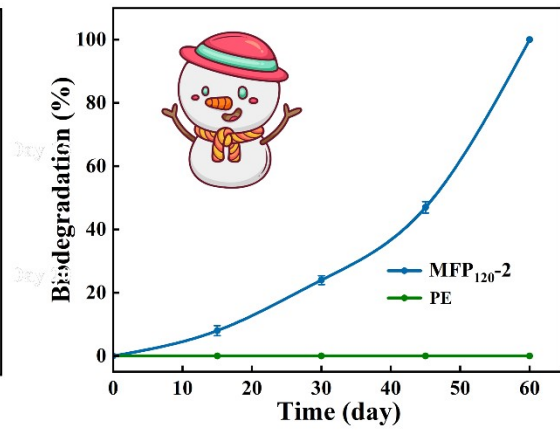

**Figure S8.** (a) Biodegradation behaviour of MFP<sub>120-2</sub> under composting conditions. (b) Biodegradation rate of MFP<sub>120-2</sub> under composting and winter landfill conditions.

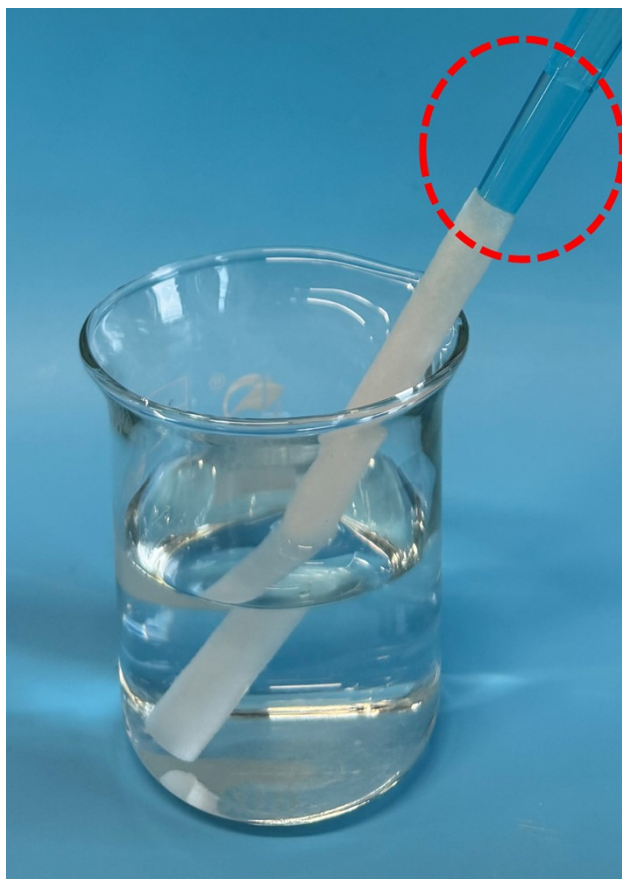

**Figure S9.** Liquid uptake performance of the MFP<sub>120</sub>-2 straw after immersion in water for 4 h, demonstrating retained structural integrity and water stability.

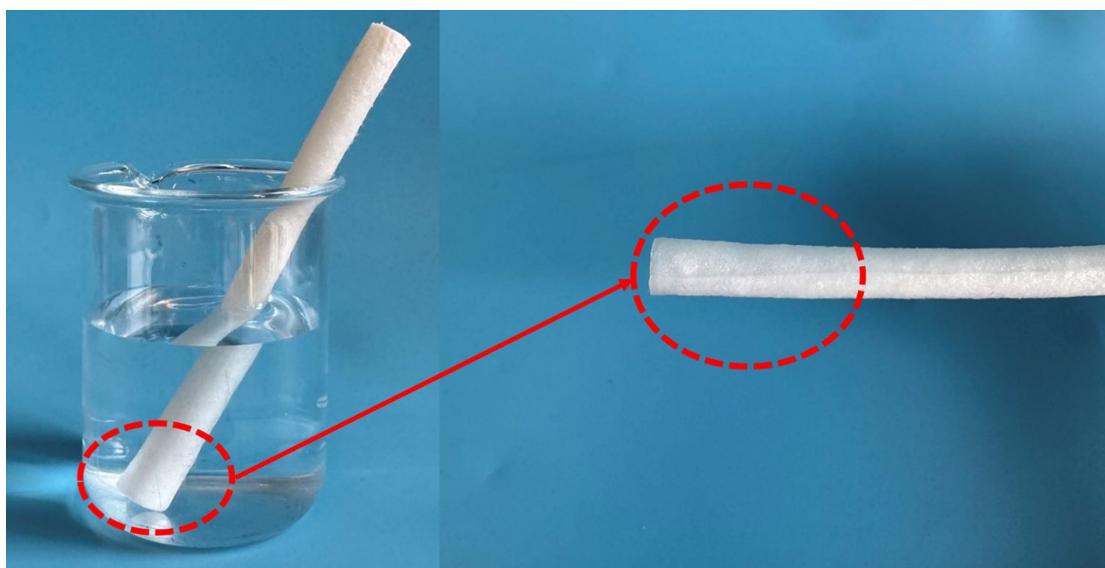

**Figure S10.** MFP<sub>120</sub>-2 straws after immersion in water for 2 days, retaining their tubular shape without clear change.

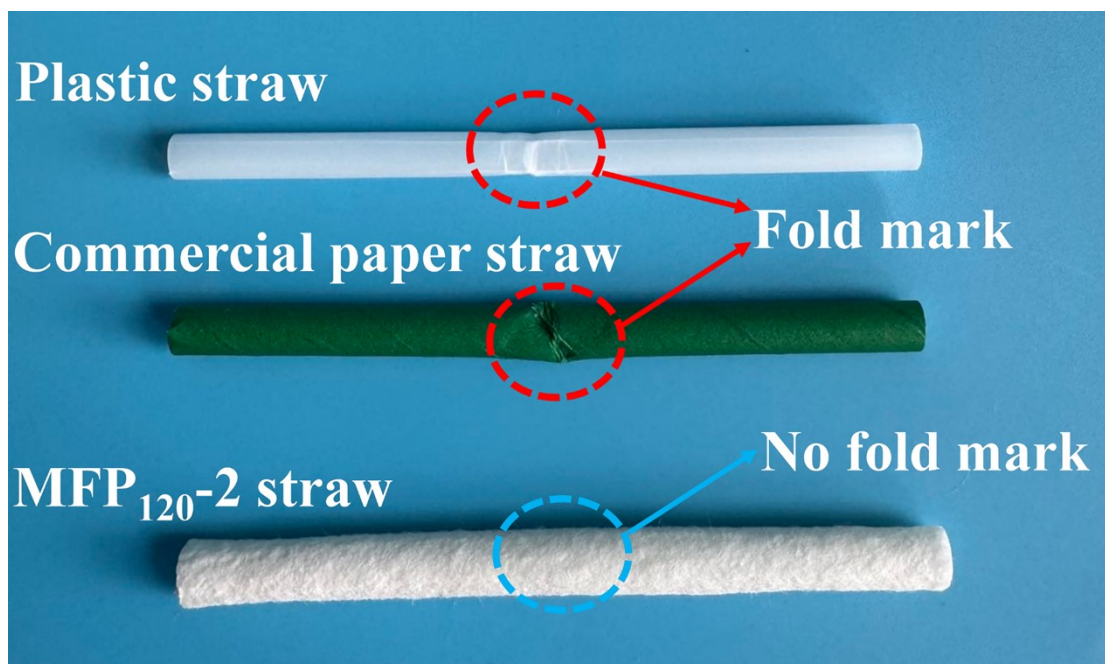

**Figure S11.** Photographs of different straws after bending deformation. Plastic and commercial paper straws exhibit visible bending marks, whereas the MFP<sub>120</sub>-2 straw shows no cracking after severe deformation, indicating superior flexibility.

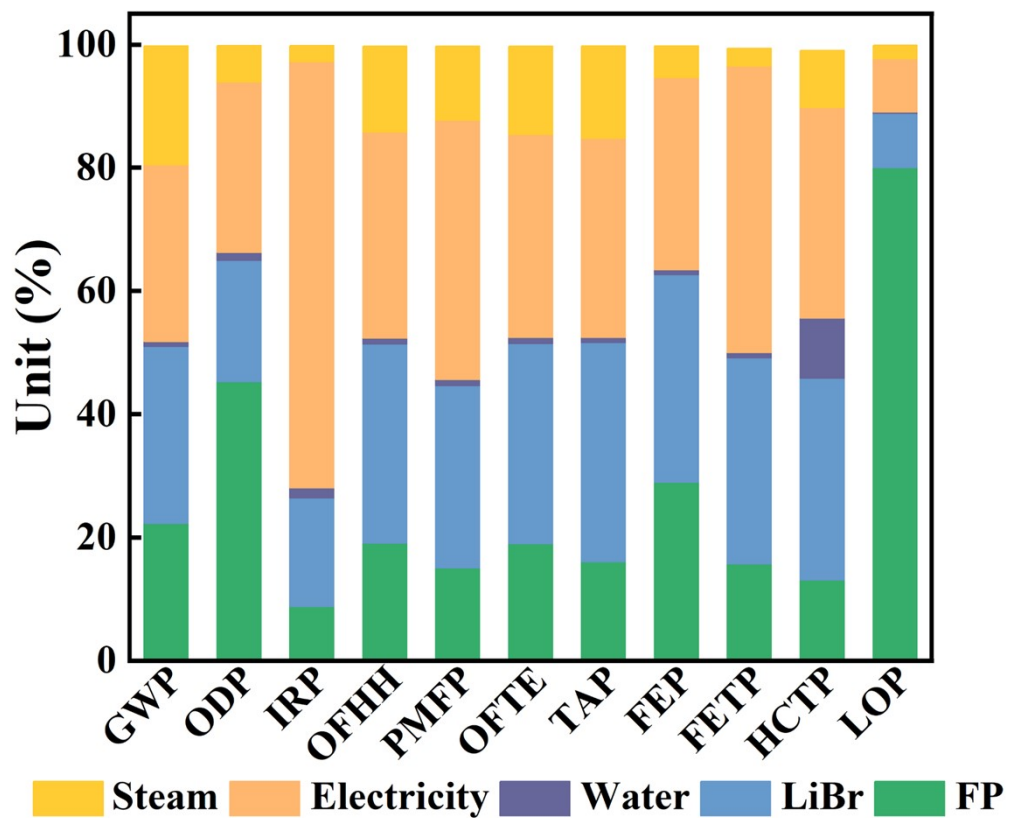

Figure S12. Contribution analysis for 1 kg MFP<sub>120-2</sub> straws.

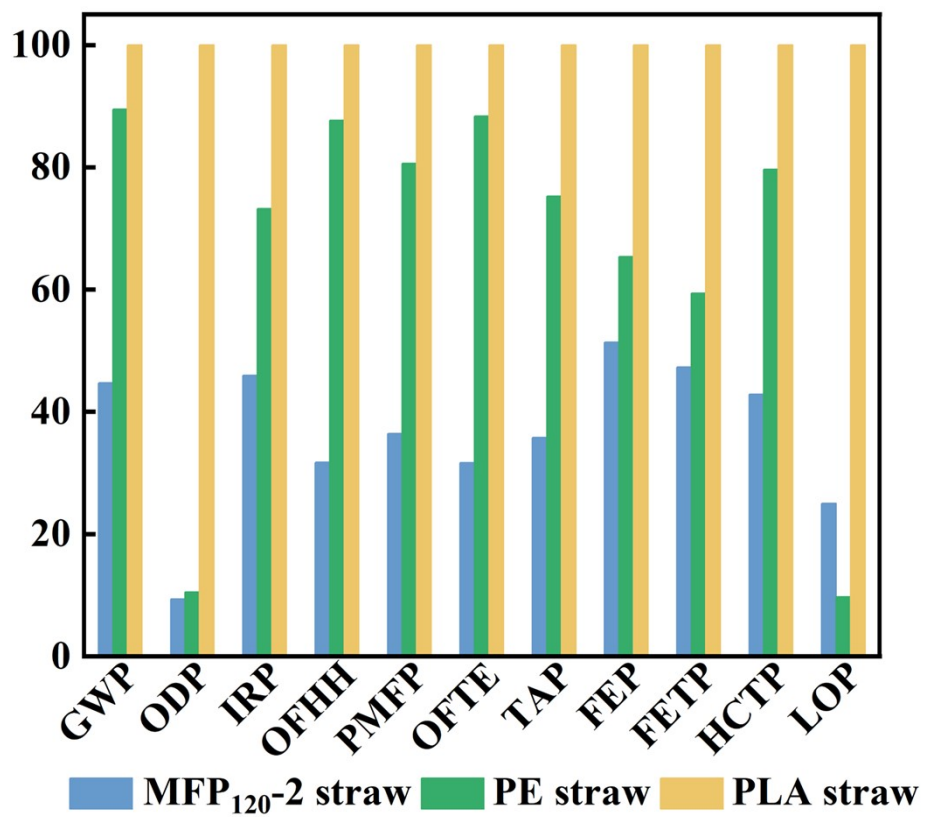

Figure S13. The stage-wise results of environmental impacts of 1 kg MFP<sub>120-2</sub> straws.

**Table S2.** The life cycle inventory data for the production of 1 kg MFP<sub>120-2</sub> straws.

| <b>Input</b>                     | <b>Amount</b> | <b>Unit</b> | <b>Source of inventory</b> |
|----------------------------------|---------------|-------------|----------------------------|
| Filter paper                     | 1             | kg          | Ecoinvent v3               |
| Lithium bromide <sup>a)</sup>    | 0.1           | kg          | -                          |
| Low-pressure steam <sup>b)</sup> | 5.2           | MJ          | Ecoinvent v3               |
| Electricity <sup>c)</sup>        | 1.34          | kWh         | Ecoinvent v3               |
| Water                            | 30            | kg          | Ecoinvent v3               |
| <b>Output</b>                    | <b>Amount</b> | <b>Unit</b> | <b>Source of inventory</b> |
| MFP <sub>120-2</sub> straw       | 1             | kg          | -                          |
| Waste water                      | 30.1          | kg          | Ecoinvent v3               |

Notes:

<sup>a)</sup> Data on lithium bromide produced from 0.282 kg of lithium hydroxide, 0.95 kg of bromine, and 0.013 kg of liquid hydrogen, where the data for lithium hydroxide, bromine, and liquid hydrogen are all from Ecoinvent v3.

<sup>b)</sup> Low pressure steam is used to recycle lithium bromide solution;

<sup>c)</sup> Electricity is used to operate the oil bath and the hot press;

### Supplementary References

1. S. Y. Oh, D. I. Yoo, Y. Shin and G. Seo, *Carbohydr. Res*, 2005, **340**, 417-428.
2. L. Yuan, J. Wan, Y. Ma, Y. Wang, M. Huang and Y. Chen, *BioResources*, 2013, **8**, 717-734.
3. S. Y. Oh, D. I. Yoo, Y. Shin, H. C. Kim, H. Y. Kim, Y. S. Chung, W. H. Park and J. H. Youk, *Carbohydr Res*, 2005, **340**, 2376-2391.
4. L. Segal, J. J. Creely, A. E. Martin and C. M. Conrad, *Text. Res. J.*, 1959, **29**, 786-794.
5. Z. Huang, C. Liu, X. Feng, M. Wu, Y. Tang and B. Li, *Cellulose*, 2020, **27**, 1-14.
6. X. Yang, L. Yu, B. Zhang, Y. Wang, X. Jia, E. Lizundia, C. Chen, F. Dong, L. Qi and L. Chen, *Nat Commun*, 2025, **16**, 6523.
7. Y. Chen, C. Huang, Z. Miao, Y. Gao, Y. Dong, K. C. Tam and H.-Y. Yu, *ACS Nano*, 2024, **18**, 8754-8767.
8. K. Huang, A. Maltais and Y. Wang, *Carbohydr. Polym. Tech.*, 2023, **6**, 100391.
9. H. Zhou, Y. Mao, Y. Zheng, T. Liu, Y. Yang, C. Si, L. Wang and L. Dai, *Chem. Eng. J.*, 2023, **471**, 144572.
